# Supplementary material
Source: ML conference proceedings conference paper supplement (https://openaccess.thecvf.com/content/ICCV2021/html/Zhao_Towards_Interpretable_Deep_ICCV_2021_paper.html)
Supplement: Supplementary file 1 [file Zhao_Towards_Interpretable_Deep_ICCV_2021_supplemental.pdf]

# Towards Interpretable Deep Metric Learning with Structural Matching

## Supplementary Material

### A. Implementation of DIML

#### A.1. The Sinkhorn Algorithm

The Sinkhorn algorithm [1] modifies the original optimal transport problem (Eq.4) into the following one:

$$\begin{aligned} T^* = \arg \min_{T \geq 0} & \text{tr}(CT^\top) + \lambda \text{tr}(T(\log(T) - \mathbf{1}\mathbf{1}^\top)^\top), \\ \text{subject to } & T\mathbf{1} = \mu^s, \quad T^\top \mathbf{1} = \mu^t, \end{aligned} \quad (\text{A.1})$$

where  $\lambda$  is a non-negative regularization parameter. By adding the entropic regularizer, the Equation (A.1) becomes a convex problem, which can be solved with Sinkhorn-Knopp algorithm [12]. Starting from an initial matrix  $K = \exp(-C/\lambda)$ , the problem can be solved by iteratively projecting onto the marginal constraints until convergence:

$$\mathbf{a} \leftarrow \mu^s / K\mathbf{b}, \quad \mathbf{b} \leftarrow \mu^t / K^\top \mathbf{a}. \quad (\text{A.2})$$

After converged, we can obtain the optimal transport plan:

$$T^* = \text{diag}(\mathbf{a})K\text{diag}(\mathbf{b}). \quad (\text{A.3})$$

#### A.2. Testing

In all of our experiments, we use ResNet50 [6] as our backbone. Therefore, the size of the feature map before the pooling layer is  $7 \times 7$ . To reduce computational costs, we first use ROI Align [5] to pool the feature map to  $G \times G$  and  $G = 4$  in most of our experiments unless otherwise noted. According to the multi-scale matching algorithm, for each image as a query, we first sort the images in the gallery using the standard cosine similarity to obtain the indices of top- $K$  candidates  $\mathcal{I}_K$  (we use  $K = 100$  in most of the experiments). We then calculate the proposed structural similarity of all the images in  $\mathcal{I}_K$ . To combine both global and structural information, we use the sum of the cosine similarity and the structural similarity for the top- $K$  images to compute their ranks. The regularization parameter  $\lambda$  in Equation (6) is set to 0.05.

#### A.3. Training

Incorporating DIML into the training objectives is quite straightforward. Generally, the loss functions in metric learning can be roughly categorized into distance-based methods

(*e.g.*, Contrastive [4], Triplet [3], Margin [16]) and similarity-based methods (*e.g.*, Multi-Similarity [15], Arcface [2], N-Pair [13]). For distance-based methods, we replace the original distance function  $d$  with the average of  $d$  and our structural distance  $d_{\text{struct}}$ ; For similarity-based methods, we replace the original similarity function  $s$  with the average of  $s$  and our structural similarity  $s_{\text{struct}}$ . In this section, we will use several loss functions as examples to demonstrate how to apply DIML during training.

**Margin [16]** The Margin loss [16] is defined as

$$\mathcal{L}_{\text{margin}}(k, l) = \left( \sigma + (-1)^{I(y^k \neq y^l)} (D_{k,l} - \beta) \right)_+, \quad (\text{A.4})$$

where  $\sigma$  and  $\beta$  are learnable parameters, and  $D_{kl}$  is used to measure the distance between image  $k$  and  $l$ :

$$D_{k,l} = \frac{1}{2} (d_{\text{struct}}(z^k, z^l) + d(\bar{z}^k, \bar{z}^l)), \quad (\text{A.5})$$

where  $d$  is Euclid distance and  $d_{\text{struct}}$  is derived from  $d$  using Equation (10).

**Multi-Similarity [15]** The original Multi-Similarity is defined as:

$$s^*(k, l) = \begin{cases} s(k, l), & s(k, l) > \min_{p \in \mathcal{P}_k} s(k, p) - \epsilon \\ s(k, l), & s(k, l) < \max_{n \in \mathcal{N}_k} s(k, n) + \epsilon \\ 0, & \text{otherwise} \end{cases} \quad (\text{A.6})$$

$$\begin{aligned} \mathcal{L}_{\text{MS}} = & \frac{1}{B} \sum_{k \in \mathcal{B}} \left[ \frac{1}{\alpha} \log \left[ 1 + \sum_{p \in \mathcal{P}_k} \exp(-\alpha(s^*(k, p) - \lambda)) \right] \right. \\ & \left. + \frac{1}{\beta} \log \left[ 1 + \sum_{n \in \mathcal{N}_k} \exp(\beta(s^*(k, n) - \lambda)) \right] \right], \end{aligned} \quad (\text{A.7})$$

where  $s(k, l) = s(\psi^k, \psi^l)$  is the cosine similarity of the embeddings  $\psi^k, \psi^l$  of the two images. To utilize DIML, we

can replace  $s$  with

$$s(k, l) \leftarrow \frac{1}{2} (s(\bar{z}^k, \bar{z}^l) + s_{\text{struct}}(z^k, z^l)). \quad (\text{A.8})$$

Note that in our notation both  $\psi^k$  and  $\bar{z}^k$  represent the same embedding in  $\mathbb{R}^D$ .

**ProxyNCA [8]** It is also worth mentioning there are slight difference when applying DIML to proxy-based methods during training. Taking ProxyNCA [8] as example, the original objective is

$$\mathcal{L}_{\text{proxy}} = -\frac{1}{B} \sum_{k \in \mathcal{B}} \log \left( \frac{\exp(-d(\psi^k, \eta^{y^k}))}{\sum_{c \in \mathcal{C} \setminus \{y^k\}} \exp(-d(\psi^k, \eta^c))} \right), \quad (\text{A.9})$$

where  $d$  is Euclid distance and  $\eta^c \in \mathbb{R}^D$  is the proxy for the  $c$ -th class. To use DIML, we need to use proxies with the size  $\mathbb{R}^{H \times W \times D}$ , denoted as  $\{\rho^c, c \in \mathcal{C}\}$ . Then, we can replace the  $d(\psi^k, \eta^c)$  with

$$d(\psi^k, \eta^c) \leftarrow \frac{1}{2} (d(\psi^k, \rho^c) + d_{\text{struct}}(z^k, \rho^c)), \quad (\text{A.10})$$

where we also note that  $\text{GAP}(\rho^c) = \eta^c$ .

## B. Experimental Details

### B.1. Evaluation Metrics

We implement the same evaluation metrics as [9], including Precision at 1 (P@1), R-Precision (RP), and Mean Average Precision at R (MAP@R).

**P@1** is also known as Recall@1 in metric learning. Given a sample  $x^q$  and feature encoder  $\phi(\cdot)$ , the set of  $k$  nearest neighbors of  $x^q$  is calculated as the precision of  $k$  nearest neighbors:

$$\mathcal{N}_q^k = \arg \min_{\mathcal{N} \subset \mathcal{X}_{\text{test}}, |\mathcal{N}|=k} \sum_{x^f \in \mathcal{N}} d_e(\phi(x^q), \phi(x^f)) \quad (\text{B.1})$$

where  $d_e(\cdot, \cdot)$  is the euclidean distance. Then P@ $k$  can be measured as

$$\text{P@}k = \frac{1}{|\mathcal{X}_{\text{test}}|} \sum_{x^q \in \mathcal{X}_{\text{test}}} \frac{1}{k} \sum_{x^i \in \mathcal{N}_q^k} \begin{cases} 1, & y^i = y^q, \\ 0, & \text{otherwise} \end{cases}, \quad (\text{B.2})$$

where  $y^i$  is the class label of sample  $x^i$ . We only report P@1 in our experiments, i.e.  $k = 1$ .

**R-precision** is defined in [9]. Specifically, for each sample  $x^q$ , let  $R$  be the number of images that are the same class with  $x^q$  and R-precision is simply defined as P@ $R$  (see Equation B.2). However, R-precision does not consider the ranking of correct retrievals, so it is not informative enough.

To tackle this problem, [9] introduced Mean Average Precision at R.

**MAP@R** is similar to mean average precision, but limit the number of nearest neighbors to R. So it replaces *precision* in MAP calculation with *R-precision*:

$$\text{MAP@}R = \frac{1}{R} \sum_{i=1}^R P(i), \quad (\text{B.3})$$

where

$$P(i) = \begin{cases} \text{P@}i, & \text{if the } i\text{-th retrieval is correct;} \\ 0, & \text{otherwise.} \end{cases} \quad (\text{B.4})$$

MAP@R is more informative than P@1 and it can be computed directly from the embedding space without clustering as post-processing.

### B.2. Experimental Setups

For most of the baseline methods, we follow the implementation and the hyper-parameters in [14]. For Proxy Anchor [7], we use their original implementation but set the hyper-parameters as [14] (batch size 112, embedding size 128, etc.). Besides various loss functions, we also experiment with different sampling methods. In Table 1 of the original paper, we use suffixes to represent the sampling methods (-R: Random; -D: Distance [16]; -S Semihard [11]; -H: Softhard [10]).

## C. Detailed Results

In the original paper, we have demonstrated the effects of truncation number  $K$  and feature map size  $G$  using charts. In this section, we provide the original numerical results that were used to plot those charts in Table 1 and Table 2.

## References

- [1] Marco Cuturi. Sinkhorn distances: lightspeed computation of optimal transport. In *NIPS*, volume 2, page 4, 2013. 1
- [2] Jiankang Deng, Jia Guo, Niannan Xue, and Stefanos Zafeiriou. Arcface: Additive angular margin loss for deep face recognition. In *CVPR*, pages 4690–4699, 2019. 1
- [3] Weifeng Ge. Deep metric learning with hierarchical triplet loss. In *ECCV*, pages 269–285, 2018. 1
- [4] Raia Hadsell, Sumit Chopra, and Yann LeCun. Dimensionality reduction by learning an invariant mapping. In *CVPR*, volume 2, pages 1735–1742, 2006. 1
- [5] Kaiming He, Georgia Gkioxari, Piotr Dollar, and Ross Girshick. Mask r-cnn. In *ICCV*, 2017. 1
- [6] Kaiming He, Xiangyu Zhang, Shaoqing Ren, and Jian Sun. Deep residual learning for image recognition. In *CVPR*, pages 770–778, 2016. 1
- [7] Sungyeon Kim, Dongwon Kim, Minsu Cho, and Suha Kwak. Proxy anchor loss for deep metric learning. In *CVPR*, pages 3238–3247, 2020. 2

Table 1: **Comparisons of different truncation numbers.** We test for different truncation number  $K$  ranging from 0 to 500. Experimental results show that a small  $K$  can already bring considerable performance improvement.

| Baseline             | $K$ | CUB-200      |              |              | Cars196      |              |              | SOP          |              |              |
|----------------------|-----|--------------|--------------|--------------|--------------|--------------|--------------|--------------|--------------|--------------|
|                      |     | P@1          | RP           | M@R          | P@1          | RP           | M@R          | P@1          | RP           | M@R          |
| Margin[16]           | 0   | 62.47        | 34.12        | 23.14        | 72.18        | 32.00        | 20.82        | 78.39        | 45.64        | 42.34        |
|                      | 10  | <b>65.16</b> | 34.56        | 23.87        | <b>76.65</b> | 32.52        | 21.72        | <b>79.26</b> | <b>46.44</b> | <b>43.20</b> |
|                      | 50  | 65.16        | 35.43        | <b>24.54</b> | 76.65        | 33.64        | 22.83        | 79.26        | 46.44        | 43.19        |
|                      | 100 | 65.16        | <b>35.48</b> | 24.54        | 76.65        | <b>33.93</b> | <b>22.95</b> | 79.26        | 46.44        | 43.19        |
|                      | 500 | 65.16        | 35.48        | 24.54        | 76.65        | 33.93        | 22.95        | 79.26        | 46.44        | 43.19        |
| Multi-Similarity[15] | 0   | 62.56        | 32.74        | 21.99        | 74.81        | 32.72        | 21.60        | 77.90        | 44.97        | 41.54        |
|                      | 10  | <b>64.89</b> | 33.21        | 22.73        | <b>78.50</b> | 33.26        | 22.50        | <b>78.53</b> | <b>45.60</b> | <b>42.24</b> |
|                      | 50  | 64.89        | 34.04        | 23.37        | 78.50        | 34.46        | 23.72        | 78.53        | 45.60        | 42.23        |
|                      | 100 | 64.89        | <b>34.12</b> | <b>23.38</b> | 78.50        | <b>34.70</b> | <b>23.81</b> | 78.53        | 45.60        | 42.23        |
|                      | 500 | 64.89        | 34.12        | 23.38        | 78.50        | 34.70        | 23.81        | 78.53        | 45.60        | 42.23        |

Table 2: **Effects of the size of feature map.** Generally, the performance of our DIML is better with higher  $G$ . DIML with  $G = 4$  yields good results within relatively low computational costs.

| Baseline              | $G$ | CUB-200      |              |              | Cars196      |              |              | SOP          |              |              |
|-----------------------|-----|--------------|--------------|--------------|--------------|--------------|--------------|--------------|--------------|--------------|
|                       |     | P@1          | RP           | M@R          | P@1          | RP           | M@R          | P@1          | RP           | M@R          |
| Margin[16]            | 1   | 62.47        | 34.12        | 23.14        | 72.18        | 32.00        | 20.82        | 78.39        | 45.64        | 42.34        |
|                       | 2   | 64.15        | 34.79        | 23.83        | 75.04        | 32.59        | 21.85        | 79.06        | 46.29        | 43.03        |
|                       | 4   | 65.16        | 35.48        | 24.54        | 76.65        | <b>33.93</b> | <b>22.95</b> | 79.26        | 46.44        | 43.19        |
|                       | 7   | <b>65.58</b> | <b>35.58</b> | <b>24.79</b> | <b>76.96</b> | 32.93        | 22.66        | <b>79.59</b> | <b>46.83</b> | <b>43.62</b> |
| Multi-Similarity [15] | 1   | 62.56        | 32.74        | 21.99        | 74.81        | 32.72        | 21.60        | 77.90        | 44.97        | 41.54        |
|                       | 2   | 63.77        | 33.33        | 22.60        | 77.45        | 33.25        | 22.60        | 78.39        | 45.56        | 42.15        |
|                       | 4   | 64.89        | 34.12        | 23.38        | 78.50        | <b>34.70</b> | <b>23.81</b> | 78.53        | 45.60        | 42.23        |
|                       | 7   | <b>65.45</b> | <b>34.15</b> | <b>23.55</b> | <b>78.93</b> | 33.64        | 23.50        | <b>78.76</b> | <b>45.90</b> | <b>42.57</b> |

- [8] Yair Movshovitz-Attias, Alexander Toshev, Thomas K Leung, Sergey Ioffe, and Saurabh Singh. No fuss distance metric learning using proxies. In *ICCV*, pages 360–368, 2017. 2
- [9] Kevin Musgrave, Serge Belongie, and Ser-Nam Lim. A metric learning reality check. In *ECCV*, pages 681–699. Springer, 2020. 2
- [10] Karsten Roth, Timo Milbich, Samarth Sinha, Prateek Gupta, Bjorn Ommer, and Joseph Paul Cohen. Revisiting training strategies and generalization performance in deep metric learning. In *ICML*, pages 8242–8252. PMLR, 2020. 2
- [11] Florian Schroff, Dmitry Kalenichenko, and James Philbin. Facenet: A unified embedding for face recognition and clustering. In *CVPR*, pages 815–823, 2015. 2
- [12] Richard Sinkhorn. Diagonal equivalence to matrices with prescribed row and column sums. *The American Mathematical Monthly*, 74(4):402–405, 1967. 1
- [13] Kihyuk Sohn. Improved deep metric learning with multi-class n-pair loss objective. In *NeurIPS*, pages 1857–1865, 2016. 1
- [14] Christian Szegedy, Vincent Vanhoucke, Sergey Ioffe, Jon Shlens, and Zbigniew Wojna. Rethinking the inception architecture for computer vision. In *CVPR*, pages 2818–2826, 2016. 2
- [15] Xun Wang, Xintong Han, Weilin Huang, Dengke Dong, and Matthew R Scott. Multi-similarity loss with general pair weighting for deep metric learning. In *CVPR*, pages 5022–5030, 2019. 1, 3
- [16] Chao-Yuan Wu, R Manmatha, Alexander J Smola, and Philipp Krahenbuhl. Sampling matters in deep embedding learning. In *ICCV*, pages 2840–2848, 2017. 1, 2, 3
